# Supplementary material for: The specific seroreactivity to ∆Np73 isoforms shows higher diagnostic ability in colorectal cancer patients than the canonical p73 protein
Source: PubMed Central journal article supplement (PMC6753153; doi:10.1038/s41598-019-49960-x), 2019-09-19
Supplement: 41598_2019_49960_MOESM1_ESM.pdf [file 41598_2019_49960_MOESM1_ESM.pdf]

**The specific seroreactivity to  $\Delta$ Np73 isoforms shows higher diagnostic ability in colorectal cancer patients than the canonical p73 protein**

**María Garranzo-Asensio<sup>1,2</sup>, Ana Guzmán-Aránguez<sup>1</sup>, Carmen Povés<sup>3</sup>, María Jesús Fernández-Aceñero<sup>4</sup>, Ana Montero-Calle<sup>2</sup>, María Ángeles Ceron<sup>4</sup>, Servando Fernandez-Diez<sup>3</sup>, Nuria Rodríguez<sup>5</sup>, Marta Gómez de Cedrón<sup>6</sup>, Ana Ramírez de Molina<sup>6</sup>, Gemma Domínguez<sup>\*,7</sup>, Rodrigo Barderas<sup>\*,2</sup>**

<sup>1</sup>Departamento de Bioquímica y Biología Molecular, Facultad de Óptica y Optometría, Universidad Complutense de Madrid, E-28040 Madrid, Spain, <sup>2</sup>UFIEC, Chronic Disease Programme, Instituto de Salud Carlos III, Majadahonda E-28220, Madrid, Spain, <sup>3</sup>Gastroenterology Unit, Hospital Universitario Clínico San Carlos, E-28040 Madrid, Spain, <sup>4</sup>Surgical Pathology Department, Hospital Universitario Clínico San Carlos, E-28040 Madrid, Spain, <sup>5</sup>Medical Oncology Department, Hospital Universitario La Paz, E-28046 Madrid, Spain, <sup>6</sup>Molecular Oncology and Nutritional Genomics of Cancer, IMDEA-FOOD, E-28049, Madrid, Spain, <sup>7</sup>Departamento de Medicina, Facultad de Medicina, Instituto de Investigaciones Biomédicas “Alberto Sols”, CSIC-UAM, E-28029 Madrid, Spain

\*Co-senior authors. To whom correspondence should be addressed:

**Supplemental Table S1. Individual clinical information of the colorectal cancer patients and controls used in the study.**

| Plasma code | Classification       | Group                           | Gender | Age | CRC stage (TNM) | p73 (RLU)* | ANp73 $\alpha$ (RLU)* | ANp73 $\beta$ (RLU)* | CEA (ng/ml) |
|-------------|----------------------|---------------------------------|--------|-----|-----------------|------------|-----------------------|----------------------|-------------|
| CT1         | Asymptomatic         | Control                         | M      | 51  |                 | 4192       | 0                     | 0                    | 0.00        |
| CT2         | Asymptomatic         | Control                         | M      | 56  |                 | 0          | 0                     | 2222                 | 0.00        |
| CT3         | Asymptomatic         | Control                         | F      | 51  |                 | 0          | 0                     | 0                    | 0.00        |
| CT4         | Asymptomatic         | Control                         | F      | 38  |                 | 381        | 0                     | 310                  | 0.00        |
| CT5         | Asymptomatic         | Control                         | M      | 42  |                 | 1347       | 2488                  | 553                  | 0.00        |
| CT6         | Asymptomatic         | Control                         | F      | 46  |                 | 2224       | 4124                  | 3589                 | 0.00        |
| CT7         | Asymptomatic         | Control                         | F      | 45  |                 | 2676       | 4871                  | 7488                 | 0.00        |
| CT8         | Asymptomatic         | Control                         | M      | 41  |                 | 2697       | 3330                  | 2361                 | 0.00        |
| CT9         | Asymptomatic         | Control                         | M      | 41  |                 | 0          | 0                     | 743                  | 0.00        |
| CT10        | Asymptomatic         | Control                         | F      | 51  |                 | 678        | 0                     | 0                    | 0.00        |
| CT11        | Asymptomatic         | Control                         | M      | 49  |                 | 0          | 0                     | 0                    | 0.00        |
| CT12        | Asymptomatic         | Control                         | F      | 47  |                 | 0          | 0                     | 0                    | 0.00        |
| CT13        | Asymptomatic         | Control                         | M      | 38  |                 | 0          | 0                     | 3031                 | 0.00        |
| CT14        | Asymptomatic         | Control                         | F      | 57  |                 | 4189       | 0                     | 0                    | 0.00        |
| CT15        | Asymptomatic         | Control                         | F      | 34  |                 | 0          | 0                     | 0                    | 0.00        |
| CT16        | Asymptomatic         | Control                         | M      | 34  |                 | 0          | 0                     | 0                    | 0.00        |
| CT17        | Asymptomatic         | Control                         | F      | 55  |                 | 0          | 0                     | 0                    | 0.00        |
| CT18        | Asymptomatic         | Control                         | F      | 46  |                 | 1245       | 0                     | 691                  | 0.00        |
| CT19        | Asymptomatic         | Control                         | M      | 40  |                 | 0          | 0                     | 3278                 | 0.00        |
| CT20        | Asymptomatic         | Control                         | F      | 50  |                 | 0          | 0                     | 1434                 | 3.67        |
| CT21        | Asymptomatic         | Control                         | F      | 41  |                 | 0          | 0                     | 3340                 | 0.00        |
| CT22        | Asymptomatic         | Control                         | F      | 37  |                 | 0          | 0                     | 3279                 | 0.00        |
| CT23        | Asymptomatic         | Control                         | F      | 48  |                 | 0          | 0                     | 7485                 | 0.00        |
| CT24        | Asymptomatic         | Control                         | F      | 52  |                 | 0          | 1376                  | 0                    | 0.00        |
| CT25        | Asymptomatic         | Control                         | M      | 49  |                 | 0          | 0                     | 9720                 | 0.00        |
| CT26        | Asymptomatic         | Control                         | F      | 38  |                 | 0          | 0                     | 4467                 | 0.00        |
| CT27        | Asymptomatic         | Control                         | M      | 31  |                 | 0          | 0                     | 6814                 | 0.00        |
| CT28        | Asymptomatic         | Control                         | F      | 47  |                 | 300        | 1964                  | 4379                 | 0.00        |
| CT29        | Asymptomatic         | Control                         | F      | 51  |                 | 0          | 4274                  | 7072                 | 0.00        |
| CT30        | Asymptomatic         | Control                         | F      | 45  |                 | 0          | 287                   | 2205                 | 0.00        |
| CT31        | Asymptomatic         | Control                         | F      | 34  |                 | 0          | 278                   | 1054                 | 0.00        |
| CT32        | Asymptomatic         | Control                         | F      | 50  |                 | 0          | 0                     | 46                   | 0.00        |
| CT33        | Asymptomatic         | Control                         | F      | 51  |                 | 0          | 12457                 | 0                    | 0.00        |
| CT34        | Asymptomatic         | Control                         | F      | 38  |                 | 0          | 0                     | 0                    | 0.00        |
| CT35        | Asymptomatic         | Control                         | F      | 44  |                 | 12853      | 4143                  | 0                    | 0.00        |
| CT36        | Asymptomatic         | Control                         | F      | 46  |                 | 38056      | 12665                 | 4050                 | 0.00        |
| CT37        | Asymptomatic         | Control                         | F      | 49  |                 | 0          | 0                     | 0                    | 0.00        |
| CT38        | Asymptomatic         | Control                         | F      | 52  |                 | 0          | 0                     | 0                    | 0.00        |
| CT39        | Asymptomatic         | Control                         | F      | 61  |                 | 0          | 0                     | 0                    | 0.00        |
| CT40        | Asymptomatic         | Control                         | M      | 39  |                 | 0          | 0                     | 0                    | 2.77        |
| CT41        | Asymptomatic         | Control                         | F      | 29  |                 | 49439      | 14076                 | 0                    | 0.00        |
| CT42        | Negative colonoscopy | Control                         | F      | 46  |                 | 0          | 0                     | 0                    | 0.00        |
| CT43        | Negative colonoscopy | Control                         | F      | 40  |                 | 0          | 0                     | 0                    | 0.00        |
| CT44        | Negative colonoscopy | Control                         | F      | 43  |                 | 0          | 0                     | 0                    | 0.00        |
| CT45        | Negative colonoscopy | Control                         | M      | 35  |                 | 0          | 0                     | 0                    | 0.00        |
| CT46        | Negative colonoscopy | Control                         | F      | 48  |                 | 0          | 0                     | 0                    | 0.00        |
| CT47        | Negative colonoscopy | Control                         | M      | 41  |                 | 0          | 0                     | 0                    | 0.00        |
| CT48        | Negative colonoscopy | Control                         | M      | 36  |                 | 0          | 0                     | 0                    | 0.00        |
| CT49        | Negative colonoscopy | Control                         | F      | 41  |                 | 0          | 0                     | 0                    | 0.00        |
| CT50        | Negative colonoscopy | Control                         | M      | 67  |                 | 1168000    | 1078000               | 0                    | 0.00        |
| CT51        | Negative colonoscopy | Control                         | F      | 61  |                 | 157000     | 326000                | 0                    | 0.00        |
| CT52        | Negative colonoscopy | Control                         | F      | 42  |                 | 0          | 0                     | 0                    | 0.00        |
| CT53        | Negative colonoscopy | Control                         | F      | 57  |                 | 244000     | 0                     | 106000               | 0.00        |
| CT54        | Negative colonoscopy | Control                         | F      | 56  |                 | 472000     | 145000                | 0                    | 2.81        |
| CT55        | Negative colonoscopy | Control                         | M      | 57  |                 | 0          | 0                     | 0                    | 0.00        |
| CT56        | Negative colonoscopy | Control                         | M      | 58  |                 | 0          | 0                     | 0                    | 0.00        |
| CT57        | Negative colonoscopy | Control                         | F      | 52  |                 | 261000     | 309000                | 187000               | 0.00        |
| CT58        | Negative colonoscopy | Control                         | M      | 64  |                 | 278000     | 262000                | 207000               | 0.00        |
| CT59        | Negative colonoscopy | Control                         | M      | 70  |                 | 0          | 0                     | 0                    | 0.00        |
| CT60        | Negative colonoscopy | Control                         | F      | 57  |                 | 0          | 0                     | 0                    | 0.00        |
| CT61        | Negative colonoscopy | Control                         | F      | 55  |                 | 0          | 0                     | 0                    | 0.00        |
| CT62        | Negative colonoscopy | Control                         | M      | 57  |                 | 0          | 0                     | 0                    | 0.00        |
| CT63        | Negative colonoscopy | Control                         | F      | 52  |                 | 0          | 0                     | 0                    | 0.00        |
| CT64        | Negative colonoscopy | Control                         | F      | 49  |                 | 0          | 0                     | 0                    | 0.00        |
| CT65        | Negative colonoscopy | Control                         | F      | 64  |                 | 0          | 0                     | 0                    | 0.00        |
| CT66        | Negative colonoscopy | Control                         | F      | 61  |                 | 285977     | 188716                | 167767               | 0.00        |
| CT67        | Negative colonoscopy | Control                         | F      | 53  |                 | 277703     | 220001                | 185480               | 0.00        |
| CT68        | Negative colonoscopy | Control                         | F      | 59  |                 | 368277     | 229277                | 239277               | 0.00        |
| PRE1        | Adenoma              | Premalignant group/pathological | M      | 60  |                 | 1070000    | 887000                | 508000               | 0.00        |
| PRE2        | Adenoma              | Premalignant group/pathological | M      | 59  |                 | 1612000    | 1054000               | 1200000              | 0.10        |
| PRE3        | Adenoma              | Premalignant group/pathological | F      | 57  |                 | 389000     | 480000                | 493000               | 0.00        |
| PRE4        | Adenoma              | Premalignant group/pathological | F      | 64  |                 | 326000     | 164000                | 308000               | 0.45        |
| PRE5        | Adenoma              | Premalignant group/pathological | F      | 54  |                 | 301000     | 926000                | 548000               | 0.00        |
| PRE6        | Adenoma              | Premalignant group/pathological | F      | 61  |                 | 0          | 0                     | 0                    | 3.14        |
| PRE7        | Adenoma              | Premalignant group/pathological | M      | 65  |                 | 0          | 0                     | 0                    | 0.00        |
| PRE8        | Adenoma              | Premalignant group/pathological | M      | 60  |                 | 34000      | 0                     | 0                    | 0.00        |
| PRE9        | Adenoma              | Premalignant group/pathological | M      | 59  |                 | 0          | 115000                | 0                    | 4.09        |
| PRE10       | Adenoma              | Premalignant group/pathological | M      | 59  |                 | 497000     | 389000                | 0                    | 0.00        |
| PRE11       | Adenoma              | Premalignant group/pathological | M      | 57  |                 | 1090000    | 830000                | 582000               | 6.76        |
| PRE12       | Adenoma              | Premalignant group/pathological | M      | 40  |                 | 367845     | 254845                | 183326               | 0.00        |
| PRE13       | Adenoma              | Premalignant group/pathological | F      | 50  |                 | 673000     | 471000                | 479000               | 2.35        |

|       |         |                                 |   |    |        |        |        |        |         |
|-------|---------|---------------------------------|---|----|--------|--------|--------|--------|---------|
| PRE14 | Adenoma | Premalignant group/pathological | M | 67 | 857000 | 691000 | 499000 | 0.00   |         |
| PRE15 | Adenoma | Premalignant group/pathological | M | 62 | 540000 | 467000 | 380000 | 0.00   |         |
| PRE16 | Adenoma | Premalignant group/pathological | F | 60 | 0      | 0      | 0      | 0.00   |         |
| PRE17 | Adenoma | Premalignant group/pathological | F | 75 | 365000 | 405000 | 241000 | 0.00   |         |
| PRE18 | Adenoma | Premalignant group/pathological | M | 70 | 187000 | 222000 | 110000 | 0.00   |         |
| PRE19 | Adenoma | Premalignant group/pathological | M | 61 | 150000 | 116000 | 40000  | 0.00   |         |
| PRE20 | Adenoma | Premalignant group/pathological | F | 59 | 197000 | 241000 | 125000 | 0.00   |         |
| PRE21 | Adenoma | Premalignant group/pathological | M | 70 | 0      | 0      | 0      | 0.00   |         |
| PRE22 | Adenoma | Premalignant group/pathological | F | 60 | 0      | 174000 | 0      | 3.43   |         |
| PRE23 | Adenoma | Premalignant group/pathological | F | 59 | 278000 | 116000 | 0      | 2.85   |         |
| PRE24 | Adenoma | Premalignant group/pathological | F | 54 | 0      | 0      | 0      | 0.47   |         |
| PRE25 | Adenoma | Premalignant group/pathological | F | 67 | 0      | 0      | 0      | 0.00   |         |
| PRE26 | Adenoma | Premalignant group/pathological | M | 56 | 0      | 0      | 0      | 0.00   |         |
| PRE27 | Adenoma | Premalignant group/pathological | M | 61 | 121339 | 0      | 0      | 0.00   |         |
| PRE28 | Adenoma | Premalignant group/pathological | F | 58 | 0      | 0      | 0      | 0.00   |         |
| PRE29 | Adenoma | Premalignant group/pathological | F | 67 | 0      | 0      | 0      | 0.00   |         |
| PRE30 | Adenoma | Premalignant group/pathological | F | 60 | 322455 | 171455 | 234455 | 0.09   |         |
| PRE31 | Adenoma | Premalignant group/pathological | M | 40 | 367845 | 254845 | 183326 | 0.00   |         |
| PRE32 | Adenoma | Premalignant group/pathological | F | 68 | 337686 | 245410 | 196473 | 0.00   |         |
| PRE33 | Adenoma | Premalignant group/pathological | F | 64 | 169029 | 133444 | 146760 | 0.00   |         |
| PRE34 | Adenoma | Premalignant group/pathological | F | 59 | 281450 | 130002 | 129287 | 0.00   |         |
| CRC1  | CRC     | CRC group/pathological          | M | 66 | I      | 0      | 77000  | 5.50   |         |
| CRC2  | CRC     | CRC group/pathological          | M | 75 | I      | 45276  | 0      | 3.00   |         |
| CRC3  | CRC     | CRC group/pathological          | M | 89 | I      | 0      | 0      | 1.30   |         |
| CRC4  | CRC     | CRC group/pathological          | M | 86 | II     | 0      | 50308  | 117.30 |         |
| CRC5  | CRC     | CRC group/pathological          | F | 60 | II     | 0      | 63000  | 0.80   |         |
| CRC6  | CRC     | CRC group/pathological          | M | 75 | IIA    | 92955  | 354955 | 258955 | 0.00    |
| CRC7  | CRC     | CRC group/pathological          | M | 75 | IIA    | 0      | 0      | 0.00   |         |
| CRC8  | CRC     | CRC group/pathological          | M | 75 | IIA    | 0      | 0      | 0.70   |         |
| CRC9  | CRC     | CRC group/pathological          | F | 75 | IIA    | 77332  | 40529  | 15407  | 37.10   |
| CRC10 | CRC     | CRC group/pathological          | F | 82 | IIA    | 0      | 38000  | 0      | 8.40    |
| CRC11 | CRC     | CRC group/pathological          | F | 82 | IIA    | 0      | 10930  | 0      | 8.40    |
| CRC12 | CRC     | CRC group/pathological          | F | 82 | IIA    | 0      | 0      | 0      | 8.40    |
| CRC13 | CRC     | CRC group/pathological          | F | 77 | IIA    | 359000 | 32000  | 0      | 50.00   |
| CRC14 | CRC     | CRC group/pathological          | F | 59 | IIA    | 89100  | 62756  | 6795   | 0.00    |
| CRC15 | CRC     | CRC group/pathological          | M | 87 | III    | 110111 | 80483  | 115031 | 9.84    |
| CRC16 | CRC     | CRC group/pathological          | M | 85 | III    | 0      | 0      | 0      | 4.00    |
| CRC17 | CRC     | CRC group/pathological          | M | 63 | IIIA   | 0      | 111664 | 0      | 231.00  |
| CRC18 | CRC     | CRC group/pathological          | M | 78 | IIIA   | 0      | 0      | 0      | 0.00    |
| CRC19 | CRC     | CRC group/pathological          | F | 66 | IIIA   | 0      | 0      | 0      | 1.80    |
| CRC20 | CRC     | CRC group/pathological          | F | 60 | IIIA   | 168966 | 46746  | 0      | 6.30    |
| CRC21 | CRC     | CRC group/pathological          | M | 71 | IIIA   | 102685 | 0      | 8196   | 0.00    |
| CRC22 | CRC     | CRC group/pathological          | M | 61 | IIIB   | 149608 | 137608 | 60608  | 1.48    |
| CRC23 | CRC     | CRC group/pathological          | F | 85 | IIIC   | 0      | 40085  | 0      | 0.00    |
| CRC24 | CRC     | CRC group/pathological          | M | 75 | IIIC   | 169320 | 0      | 137466 | 1.20    |
| CRC25 | CRC     | CRC group/pathological          | M | 77 | IIIB   | 0      | 0      | 0      | 3.20    |
| CRC26 | CRC     | CRC group/pathological          | F | 66 | IV     | 109487 | 96821  | 50662  | 19.90   |
| CRC27 | CRC     | CRC group/pathological          | F | 51 | IV     | 46346  | 58753  | 33823  | 13.90   |
| CRC28 | CRC     | CRC group/pathological          | F | 66 | IV     | 109463 | 53709  | 50340  | 1539.00 |
| CRC29 | CRC     | CRC group/pathological          | M | 84 | IV     | 236071 | 31707  | 65202  | 7.20    |
| CRC30 | CRC     | CRC group/pathological          | M | 72 | IV     | 0      | 0      | 0      | 45.30   |
| CRC31 | CRC     | CRC group/pathological          | F | 58 | IV     | 184000 | 199000 | 23000  | 5.70    |
| CRC32 | CRC     | CRC group/pathological          | F | 87 | IV     | 24000  | 16000  | 0      | 4.00    |
| CRC33 | CRC     | CRC group/pathological          | F | 74 | IV     | 0      | 0      | 0      | 8.90    |
| CRC34 | CRC     | CRC group/pathological          | F | 59 | IV     | 0      | 18000  | 0      | 0.00    |
| CRC35 | CRC     | CRC group/pathological          | F | 55 | IV     | 19278  | 12888  | 47169  | 0.00    |
| CRC36 | CRC     | CRC group/pathological          | F | 74 | IV     | 132755 | 0      | 132517 | 6.96    |
| CRC37 | CRC     | CRC group/pathological          | M | 82 | IV     | 0      | 0      | 0      | 316.00  |
| CRC38 | CRC     | CRC group/pathological          | M | 84 | IV     | 32583  | 2774   | 91248  | 4.80    |
| CRC39 | CRC     | CRC group/pathological          | F | 58 | IV     | 84957  | 3247   | 27593  | 0.50    |
| CRC40 | CRC     | CRC group/pathological          | M | 54 | IV     | 19687  | 35489  | 17085  | 2.40    |
| CRC41 | CRC     | CRC group/pathological          | M | 54 | IV     | 271000 | 0      | 62000  | 2.40    |
| CRC42 | CRC     | CRC group/pathological          | F | 51 | IV     | 57217  | 45816  | 10953  | 0.50    |
| CRC43 | CRC     | CRC group/pathological          | F | 77 | IV     | 0      | 0      | 0      | 2.40    |

\*RLU, Relative Luminescence Units

**Supplementary Table S2. Information of the primary and secondary antibodies or reagents used in the study.**

| <b>Primary Antibodies</b>                                       |                  |               |                    |                 |                 |                  |
|-----------------------------------------------------------------|------------------|---------------|--------------------|-----------------|-----------------|------------------|
| <b>Antibody target</b>                                          | <b>Clonality</b> | <b>Source</b> | <b>Application</b> | <b>Dilution</b> | <b>Provider</b> | <b>Reference</b> |
| p73                                                             | Monoclonal       | Mouse         | WB                 | 1:1000          | Pierce          | 38c674.2         |
| GST                                                             | Monoclonal       | Mouse         | WB                 | 1:5000          | Cell Signaling  | 2624             |
| GST                                                             | Polyclonal       | Rabbit        | ELISA              | 1:100           | GE Healthcare   | 27457701         |
| <b>HRP-labeled secondary antibodies or HRP-labeled reagents</b> |                  |               |                    |                 |                 |                  |
| <b>Name</b>                                                     | <b>Clonality</b> | <b>Source</b> | <b>Application</b> | <b>Dilution</b> | <b>Provider</b> |                  |
| HRP anti-mouse                                                  | Polyclonal       | Goat          | WB                 | 1:2500          | Dako            |                  |
| HRP anti-rabbit                                                 | Polyclonal       | Goat          | WB                 | 1:3000          | BioRad          |                  |
| HRP Human-IgG-biotin                                            | Polyclonal       | Goat          | ELISA              | 1:20000         | Jackson         |                  |
| HRP-streptavidin                                                |                  |               | ELISA              | 1:1000          | Raybiotech      |                  |
| HRP Human-IgG                                                   | Polyclonal       | Goat          | ELISA              | 1:3000          | Dako            |                  |

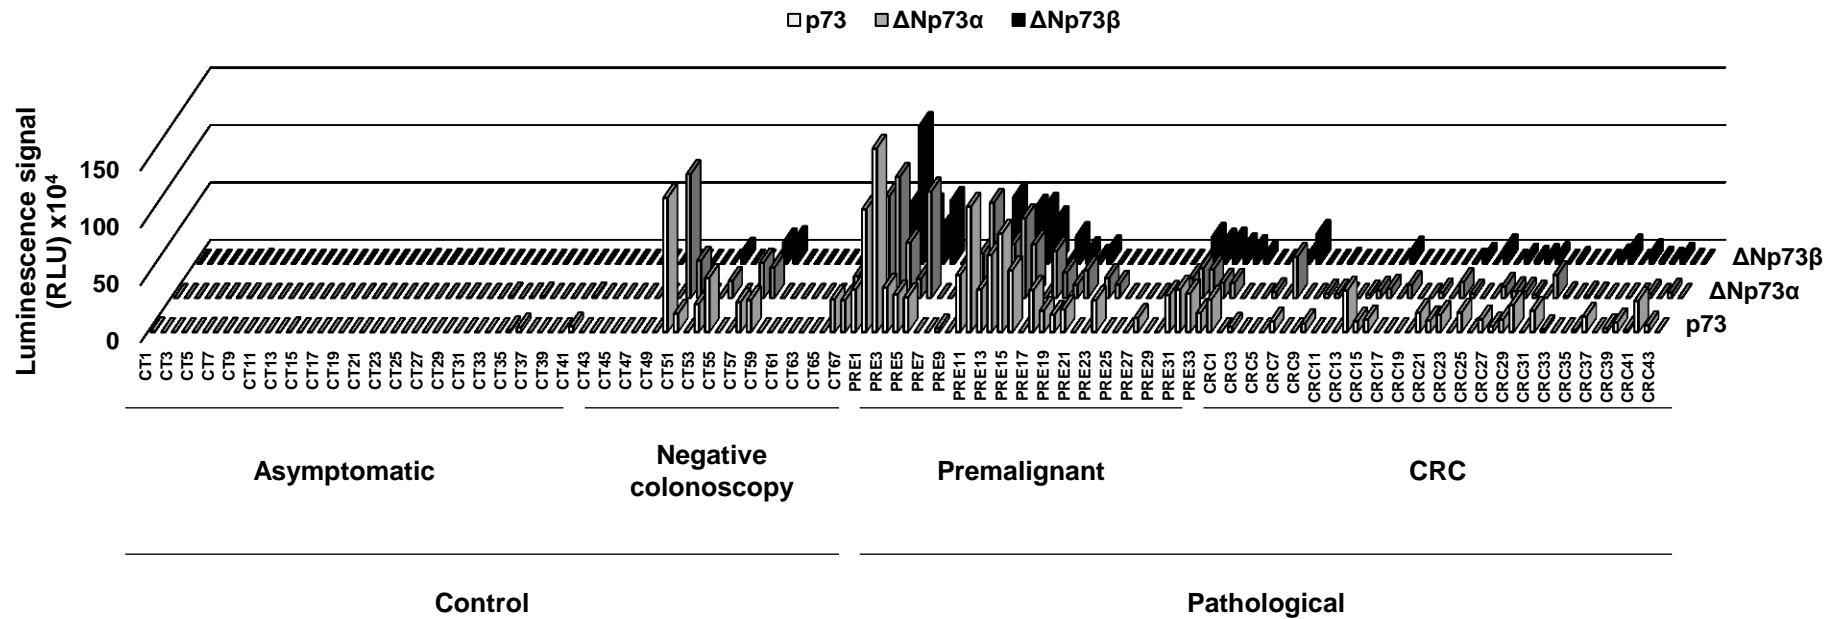

### Supplementary Fig. S1.

Evaluation of the seroreactivity to p73, ΔNp73α, and ΔNp73β. Plasma from colorectal cancer patients, and premalignant individuals showed specific reactivity against p73, ΔNp73α and ΔNp73β in comparison to control samples (asymptomatic and control individuals with negative colonoscopy). Plasma was tested by the ELISA-based Luminescence test using the proteins expressed in vitro fused to GST in the C-terminal end. Results are represented as bar graph comparing the seroreactivity of each plasma sample against all analyzed proteins. Remarkably, since during the course of the investigations we found six seroreactive controls with negative colonoscopy that were diagnosed cancer lesions non-associated to CRC (not included in the study and in the statistical analysis), those seroreactive control individuals with negative colonoscopy depicted in the figure are subjected to extensive clinical management for further assessment.

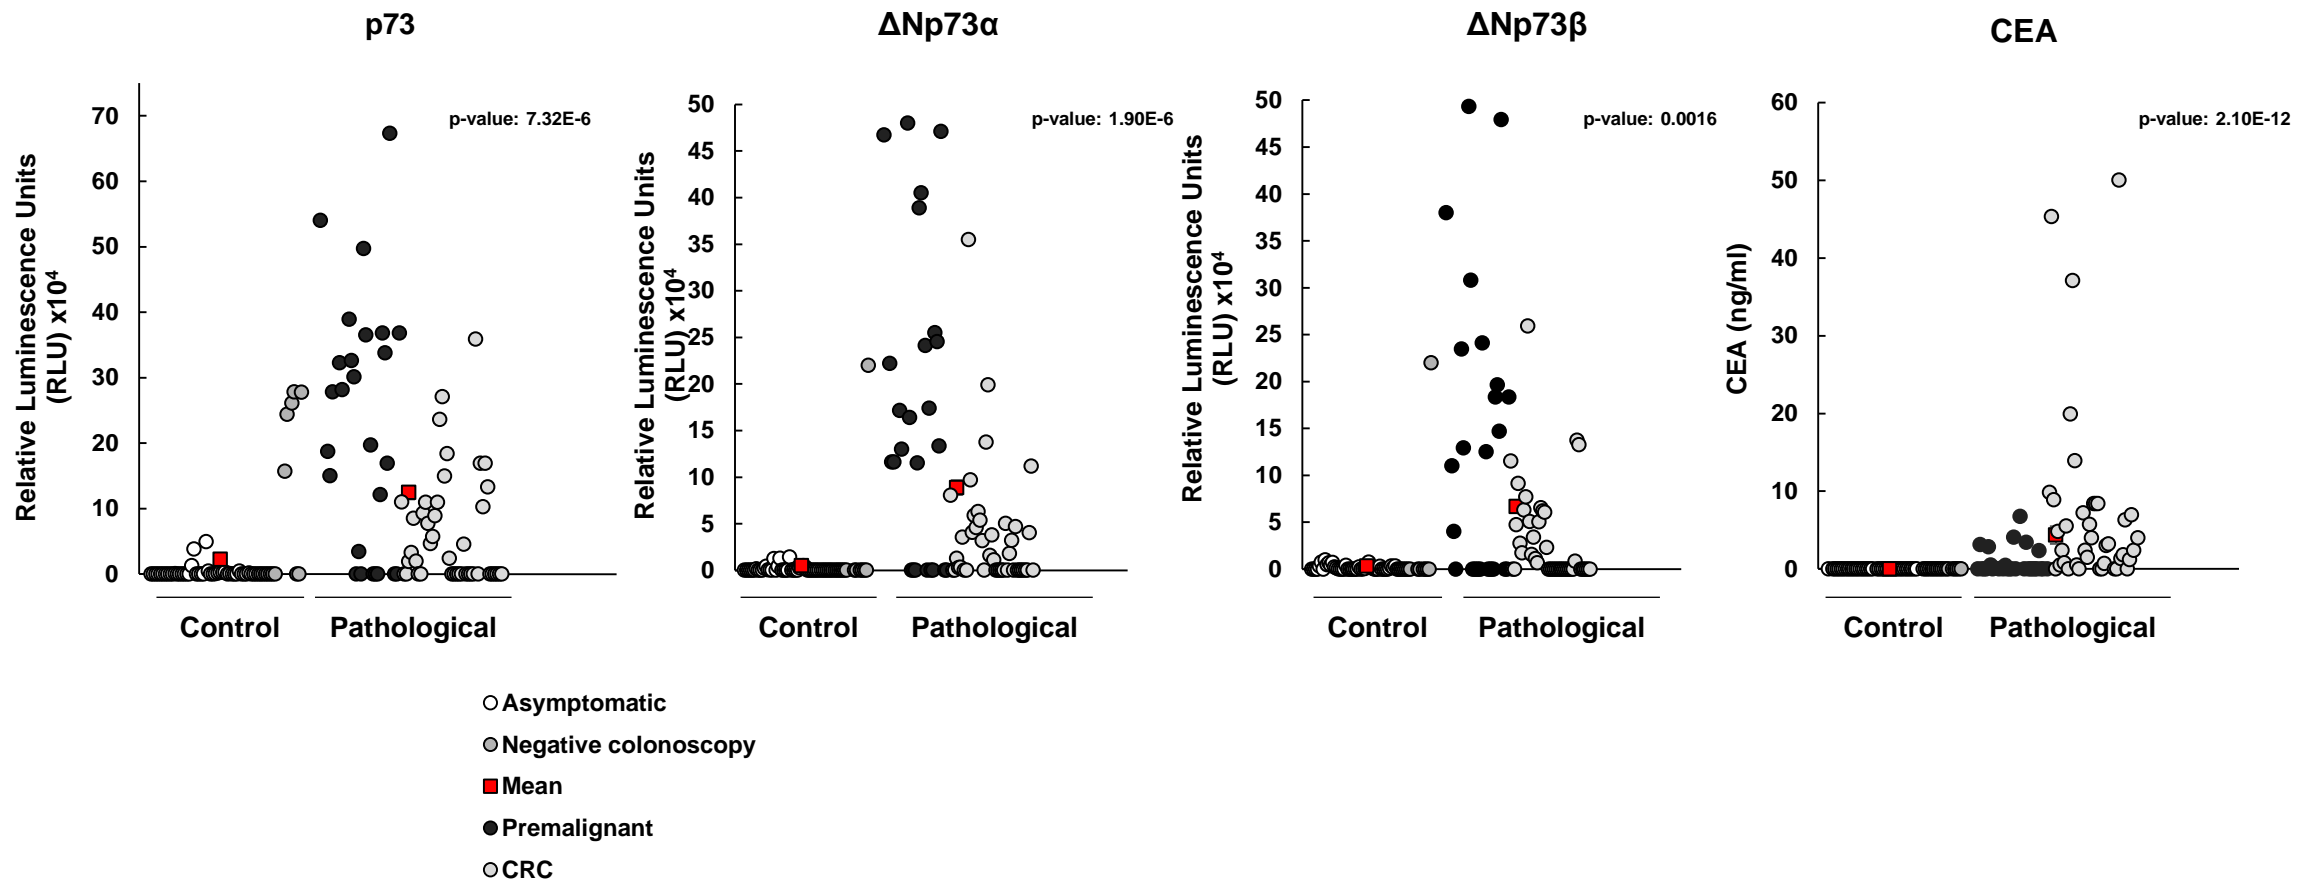

### Supplementary Fig. S2.

Dot-plot analysis of the seroreactivity to p73, ΔNp73α, and ΔNp73β in comparison to CEA values. The individual seroreactivity of each patient to p73, ΔNp73α, and ΔNp73β with the characteristics of all plasma samples is shown. Statistical differences (p-value=7.32e-06, 1.90e-06, and 0.0016) were found comparing the mean value of the luminescence signal obtained for each proteoform (p73, ΔNp73α, and ΔNp73β, respectively) for the control group and the pathological groups. Statistical differences (p-value=2e-12) were also found for CEA values in discriminating control and pathological groups.

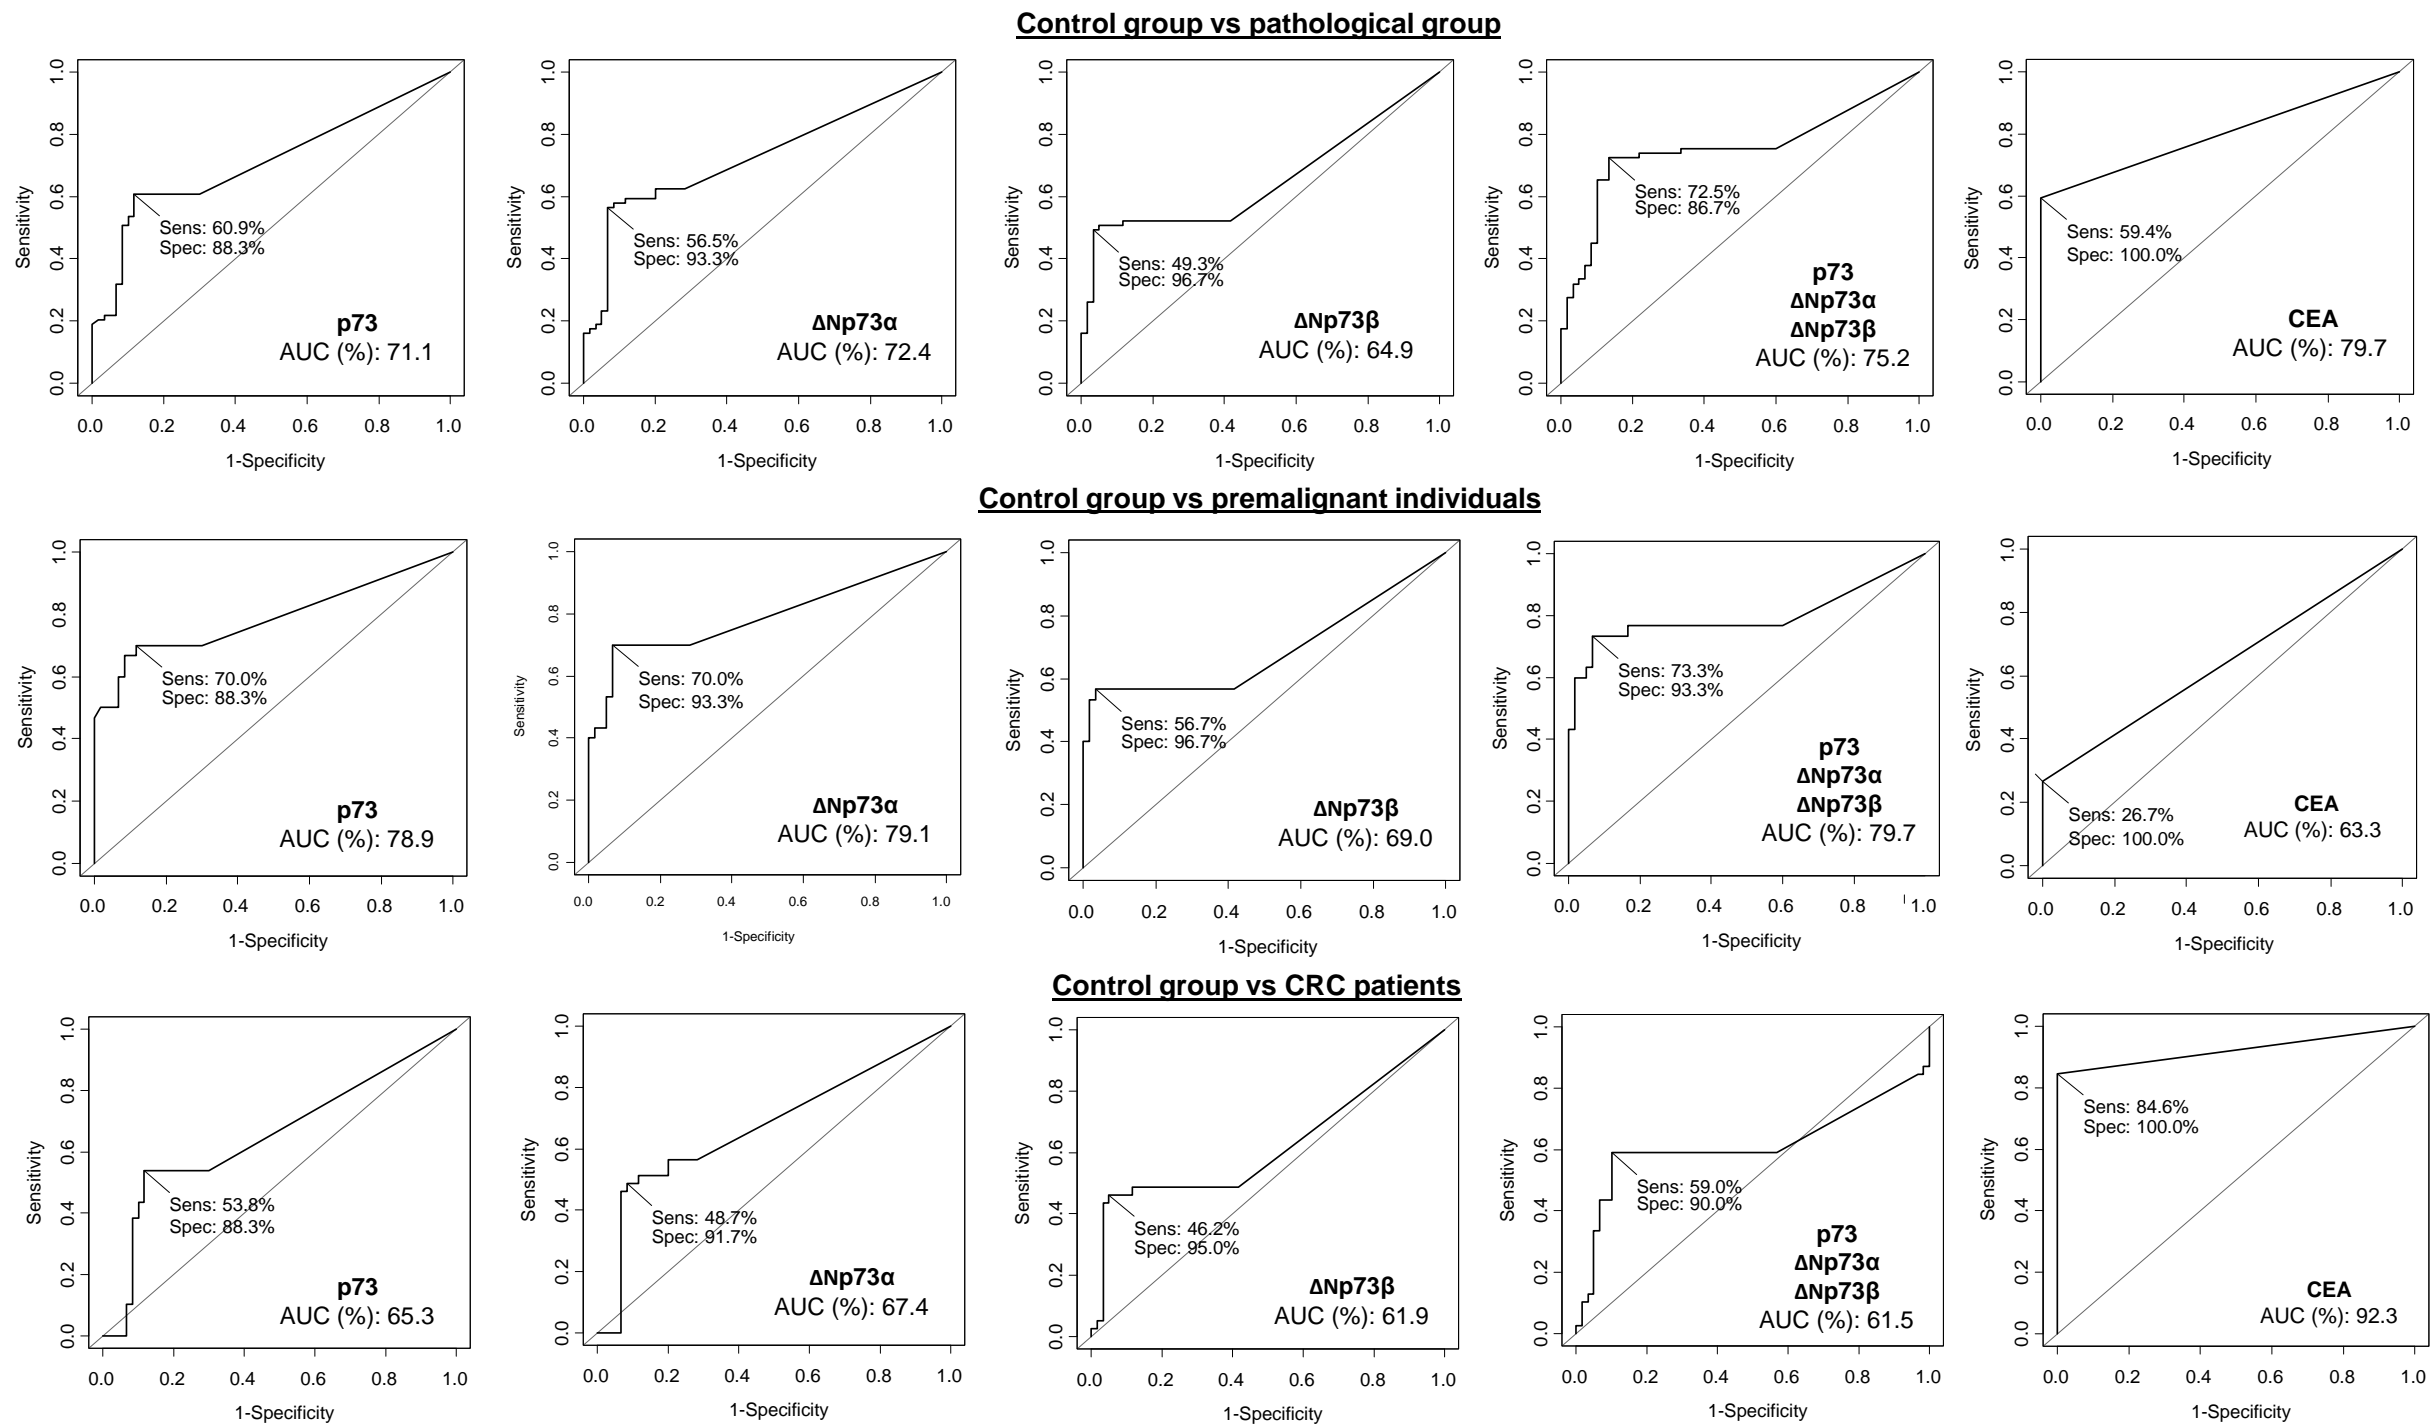

**Supplementary Fig. S3.**

Individual and combined ROC curves for the seroreactivity to p73,  $\Delta$ Np73 $\alpha$ , or  $\Delta$ Np73 $\beta$  were calculated in comparison to CEA values to assess their predictive value according to the indicated comparisons.

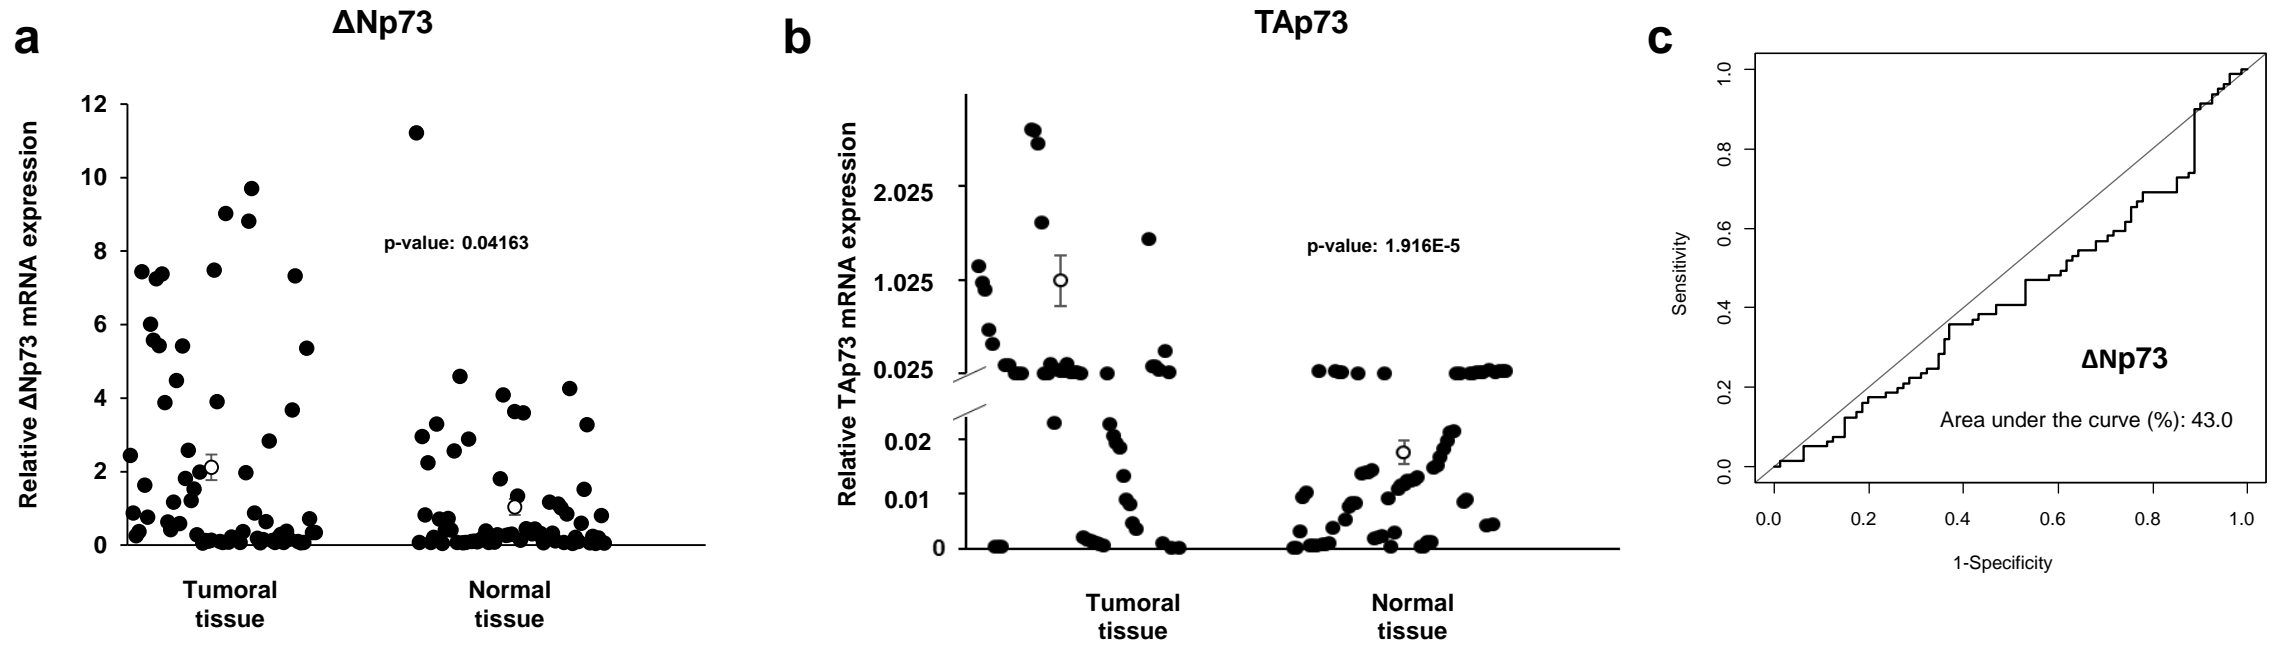

### Supplementary Fig. S4.

Dot-plot representation of the evaluation of  $\Delta Np73$  and TAp73 relative mRNA expression levels in paired normal and pathological tissue samples by qPCR. (a) For  $\Delta Np73$ , relative mRNA expression  $2.12 \pm 0.35$  (mean  $\pm$  SEM) was found in pathological tissue, while values of  $1.05 \pm 0.13$  (mean  $\pm$  SEM) were found in normal tissue (p-value=0.03642). (b) For TAp73, relative mRNA expression of  $1.02 \pm 0.27$  (mean  $\pm$  SEM) was found in pathological tissue, while values of  $0.017 \pm 0.002$  (mean  $\pm$  SEM) were found in normal tissue (p-value=2.662e-5). (c) Assessment of the predictive value of the relative mRNA expression levels for  $\Delta Np73$  in tissue samples of healthy individuals and premalignant and CRC subjects was performed through ROC curves.



GST mAb immunostaining from Figure 1

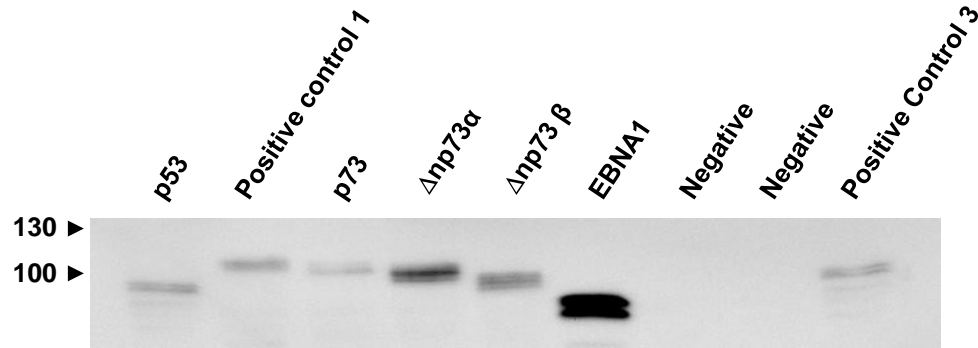

p73 mAb immunostaining from Figure 1

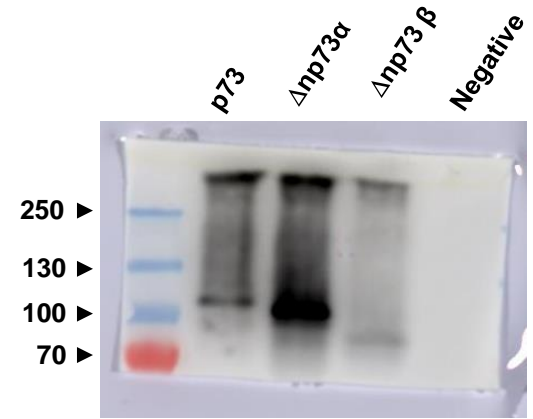

p73  
Δnp73α  
Δnp73 β

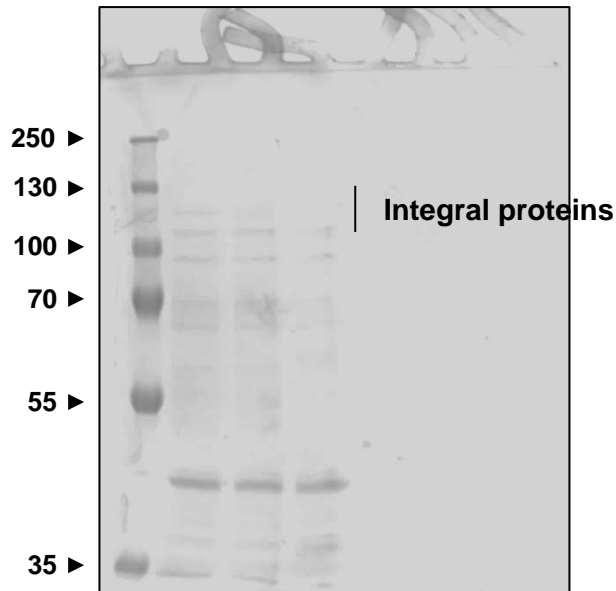

Coomassie Blue staining from Figure 5

p73  
Δnp73α  
Δnp73 β

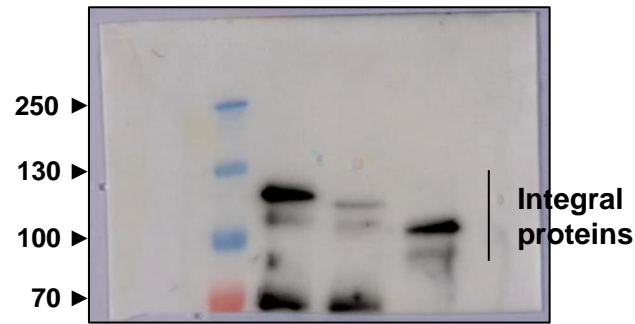

HaloTag pAb immunostaining from Figure 5

p73  
Δnp73α  
Δnp73 β

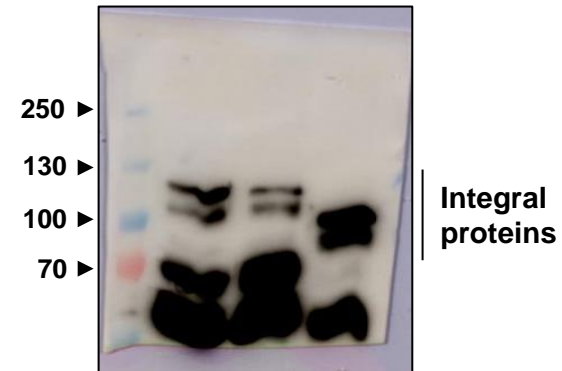

p73 mAb immunostaining from Figure 5

**Supplementary Fig. S5.**

Full-length blots/gels from figures 1 and 5 are presented.
